EDUCATION

# The RCSB PDB “Molecule of the Month”: Inspiring a Molecular View of Biology

David S. Goodsell<sup>1,2\*</sup>, Shuchismita Dutta<sup>1,3</sup>, Christine Zardecki<sup>1,3</sup>, Maria Voigt<sup>1,3</sup>, Helen M. Berman<sup>1,3</sup>, Stephen K. Burley<sup>1,3,4,5</sup>

**1** RCSB Protein Data Bank, **2** Department of Integrative Structural and Computational Biology, The Scripps Research Institute, La Jolla, California, United States of America, **3** Center for Integrative Proteomics Research and Department of Chemistry and Chemical Biology, Rutgers, The State University of New Jersey, New Brunswick, New Jersey, United States of America, **4** BioMaPS Institute for Quantitative Biology and Cancer Institute of New Jersey, Rutgers, The State University of New Jersey, New Brunswick, New Jersey, United States of America, **5** San Diego Supercomputer Center and Skaggs School of Pharmaceutical Sciences, University of California, San Diego, San Diego, California, United States of America

\* [goodsell@scripps.edu](mailto:goodsell@scripps.edu)

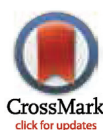

## OPEN ACCESS

**Citation:** Goodsell DS, Dutta S, Zardecki C, Voigt M, Berman HM, Burley SK (2015) The RCSB PDB “Molecule of the Month”: Inspiring a Molecular View of Biology. *PLoS Biol* 13(5): e1002140. doi:10.1371/journal.pbio.1002140

**Published:** May 5, 2015

**Copyright:** © 2015 Goodsell et al. This is an open access article distributed under the terms of the [Creative Commons Attribution License](https://creativecommons.org/licenses/by/4.0/), which permits unrestricted use, distribution, and reproduction in any medium, provided the original author and source are credited.

**Funding:** The authors were supported by the National Science Foundation ([www.nsf.gov](http://www.nsf.gov)) DBI-1338415. The funders had no role in study design, data collection and analysis, decision to publish, or preparation of the manuscript.

**Competing Interests:** The authors have declared that no competing interests exist.

**Abbreviations:** 3-D, three-dimensional; CBM MSOE, Center for BioMolecular Modeling at the Milwaukee School of Engineering; CREST, Connecting Researchers, Educators and Students; MotM, Molecule of the Month; PDB, Protein Data Bank; RCSB PDB, Research Collaboratory for Structural Bioinformatics Protein Data Bank; SMART, Students Modeling a Research Topic; wwPDB, worldwide PDB organization.

## Abstract

The Research Collaboratory for Structural Bioinformatics (RCSB) Molecule of the Month series provides a curated introduction to the 3-D biomolecular structures available in the Protein Data Bank archive and the tools that are available at the RCSB website for accessing and exploring them. A variety of educational materials, such as articles, videos, posters, hands-on activities, lesson plans, and curricula, build on this series for use in a variety of educational settings as a general introduction to key topics, such as enzyme action, protein synthesis, and viruses. The series and associated educational materials are freely available at [www.rcsb.org](http://www.rcsb.org).

## Introduction

Three-dimensional (3-D) structures of biological macromolecules are important because “function follows form” in biology. Knowledge of the shape, structure, and interactions of biological macromolecules (proteins, nucleic acids, and carbohydrates) helps us understand and “see” biology at the molecular level in atomic detail [1]. Changes in shape, chemical properties, and assemblages of biomolecules are critical to understanding disease processes and in discovering and developing targeted treatments for diseases. Since 2000, a monthly feature at the Research Collaboratory for Structural Bioinformatics Protein Data Bank (RCSB PDB) [2], called “Molecule of the Month” (MotM), has highlighted structures and functions of selected biological macromolecules and helped explain their importance in biology and medicine. Today, more than 180 of these monthly features provide users with a curated sampling of the Protein Data Bank (PDB).

Interactive tutorials describing biomolecular subjects were pioneered by Eric Martz [3], initially using Chime and Protein Explorer and more recently using Jmol/JSmol. Concurrent with development of the Molecule of the Month at the RCSB PDB, several projects have developed

related resources that allow users to view and explore PDB structures, including the InterPro “Protein Focus” (formerly known as “Protein of the Month”) and “Quips” [4], both of which come from the European Bioinformatics Institute (EMBL-EBI), and Proteopedia [5] from the Weizmann Institute, which uses a crowdsourcing approach based on Wikipedia.

Established in 1971 as the first open access digital resource in biology, the PDB [6] provides free, global access to more than 100,000 experimentally determined, 3-D, atomic structures of biological macromolecules. These data are widely used by structural biologists and other scientists working in basic and applied sciences. The same data are also made available to students, educators, and general audiences to promote understanding and discovery of new science. The PDB archive is maintained by the worldwide PDB organization (wwPDB), which today encompasses regional data centers in the United States (RCSB PDB; <http://www.rcsb.org>) at Rutgers University and University of California, San Diego; the Biological Magnetic Resonance Data Bank at University of Wisconsin, Madison; and centers in Europe (Protein Data Bank in Europe, PDBe; <http://pdbe.org>) and Japan (Protein Data Bank in Japan, PDBj; <http://pdbj.org>) [6]. The wwPDB data centers collaboratively manage data deposition and validation. Thereafter, each data center provides online access to contents of the PDB archive. The primary data distributed by all centers is the same, but each center offers different views, tools, and resources for accessing and using the information. The RCSB PDB [7] offers both expert (<http://www.rcsb.org>) and introductory/educational portals (<http://www.rcsb.org/pdb-101>) to the PDB archive [8].

The PDB-101 educational portal allows non-expert users to explore biology through a structural lens and learn how to use and understand PDB data. This resource presents a wide range of educational materials, such as articles, videos, posters, hands-on activities, lesson plans, and curricula (Box 1). Since 2000, the MotM has profiled molecular structures, together with RCSB PDB tools to explore them. Herein, we describe the conceptual design of these features, their use in research and education, and their ability to bring a structural view of biology and medicine to a general audience.

### Box 1. PDB-101 at a Glance

PDB-101 (<http://www.rcsb.org/pdb-101>) provides an introduction to key structural biology topics and access to relevant biomolecular structures. Monthly MotM features serve as a bridge between traditional teaching materials and the primary scientific data, which is freely available without restrictions on usage from the PDB archive.

#### Key components

- Molecule of the Month—Short, illustrated features on selected molecules from the archive provide a sampling of the PDB holdings.
- Structural View of Biology Browser—MotM features are organized by theme for exploration by all users.
- Educational Resources—Various materials, including posters, articles, hands-on activities, images, and animations, are available for educational use.
- Video Challenge—Instructions, rules, resources, and information related to a competition for high school students are available here.
- Curricula—Curricula have been developed through collaborations and participation of scientists, curriculum design experts, educators, clinicians, and local teachers.

## Box 2. Learning about Biology from MotM Features

Topics presented in MotM features can be organized by user educational background.

### Elementary and Middle School

- **Biological Information:** The primary feature on DNA highlights the double helical structure of B-DNA and the nature of Watson-Crick base pairing. Other features explain how DNA is read, duplicated, regulated, and repaired.
- **Viruses:** Many features on well-known viruses, such as Ebola virus, HIV, influenza, and rhinovirus help to show the science behind the news.

### High School (General Biology)

- **Mechanism of Protein Synthesis:** A feature on ribosomes explains the multi-step process of protein synthesis. Other features describe supporting players, such as the transfer RNAs and elongation factors.
- **Molecular Recognition:** An introductory feature on hemoglobin presents an example of molecular recognition, highlighting protein motions that regulate oxygen binding in the lung and release in the blood stream.

### High School (AP Biology), Undergraduate, and Beyond

- **Enzyme Action:** Features describe various enzymes commonly used in research, including carbonic anhydrase and catalase, revealing how structure underpins enzymatic activity.
- **Molecular Basis of Disease:** Many features describe molecules involved in cancer, explaining the connection between human diseases and gene mutations affecting protein structure and function.
- **Biotechnology and Nanotechnology:** Several features highlight molecular structures designed by scientists, such as artificial DNA lattices and protein cages, revealing how understanding of molecular structure and function can be put to practical use.

## Design of the Molecule of the Month

MotM features introduce 3-D structures of proteins, nucleic acids, and carbohydrates in the context of basic and applied biological and medical research. Themes for the features are selected from topics of general interest ([Box 2](#), [Fig 1](#)), including molecules related to human health and disease (for example, hemoglobin and collagen), biological machines (ribosomes), and current events (Ebola virus, ricin, anthrax, and HIV/AIDS). Non-technical text explains the overall shapes of relevant biomolecules and highlights structural features important for their functions while illustrations highlight molecular structural features described in the text ([Fig 2](#)). Accompanying interactive JSmol views present curated explorations of one or more relevant

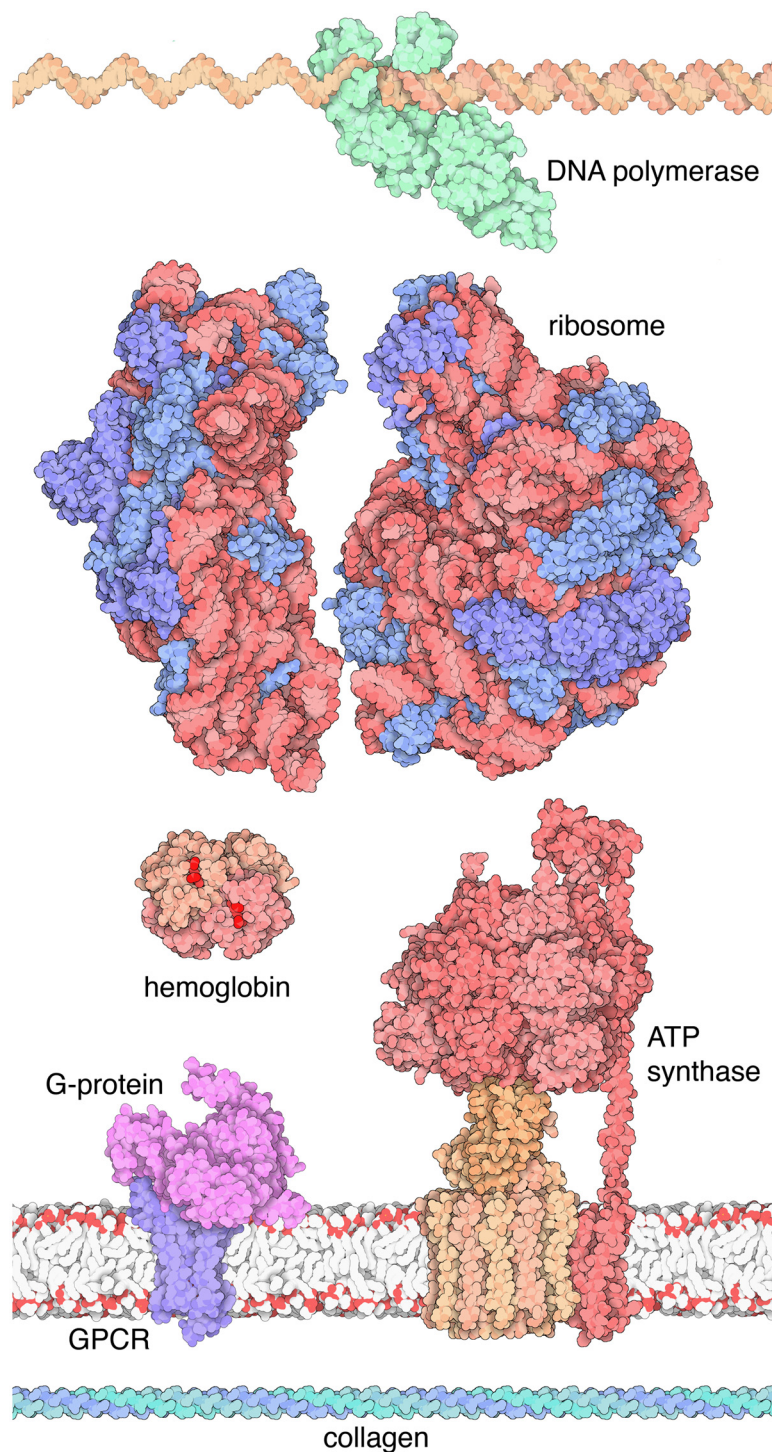

**Fig 1. Molecules highlighted in the MotM features.** As of the end of 2014, 180 different molecules have been presented in Molecule of the Month features. Topics are selected to promote understanding of biomolecular structure and function and connections to human health and disease as well as biotechnology. Some of the more popular subjects are depicted herein. From top to bottom: DNA polymerase [16], ribosome [17,18], hemoglobin [19], ATP synthase [20,21], a G-protein bound to a G-protein-coupled receptor (GPCR) [22], and the collagen triple helix [23].

doi:10.1371/journal.pbio.1002140.g001



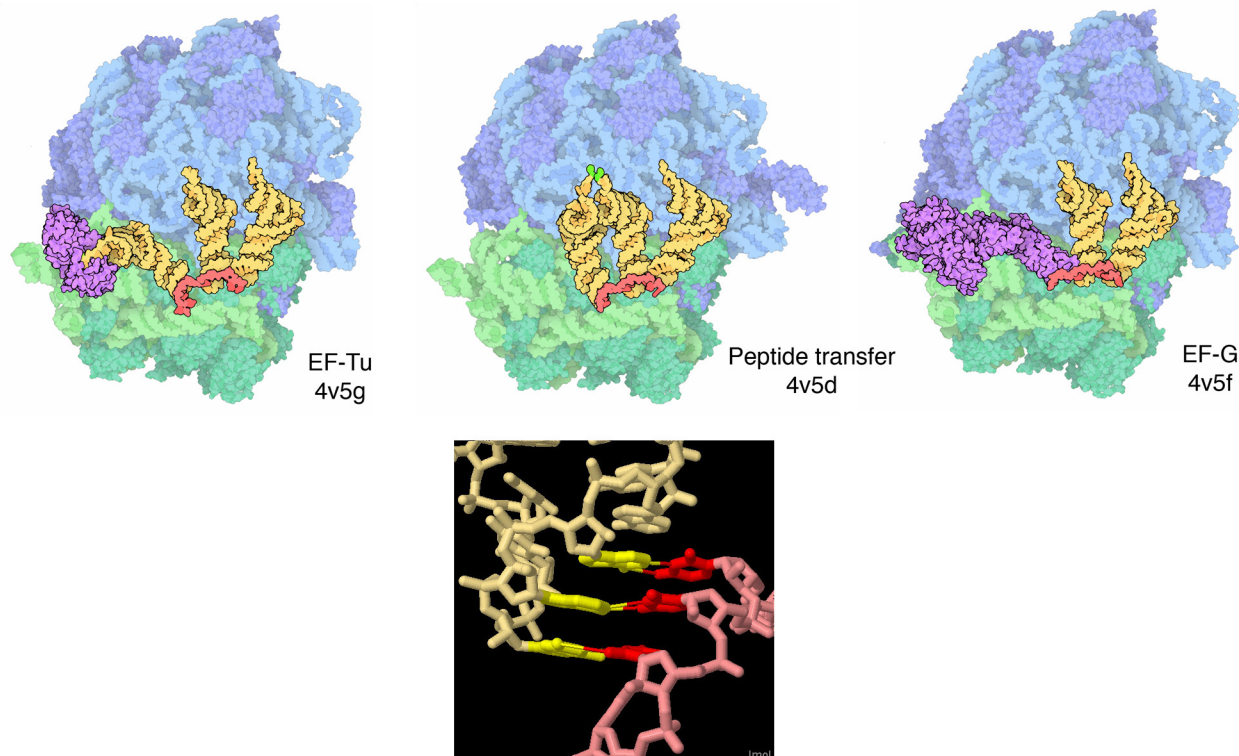

**Fig 2. Images from MotM features.** For the 2010 column on the ribosome, structures were chosen to exemplify discrete mechanistic steps in protein synthesis, including the elongation phase (top) [24–26]. The style of the illustration highlights major molecular players: ribosomal subunits in blue (large) and green (small), transfer RNA in yellow, messenger RNA in red, and elongation factors in purple. The non-photorealistic style is designed to focus attention on overall shape, size, and molecular interactions, while still giving a sense of the component atoms. An interactive JSmol was also included in the "Exploring the Structure" section of the column, allowing users to explore firsthand the codon-anticodon interaction (bottom). This illustration shows a close-up of the "decoding center" of the ribosome.

doi:10.1371/journal.pbio.1002140.g002

structures allowing users to view them in 3-D. (JSmol is an open-source HTML5 viewer for chemical structures, available at <http://wiki.jmol.org>.)

Links to featured PDB structures allow users to access specific RCSB PDB pages containing detailed information about the structure. In addition, links to abridged versions of the structure pages provide access to short descriptions of its biological function, an interactive JSmol 3-D interactive viewer, and sequences of protein and nucleic acid polymers of the molecules. Related PDB structures are also provided as starting points for further explorations, giving non-experts access to a curated subset of PDB structures to increase familiarity with visualization and help them take advantage of more complex resources, including more powerful visualization tools, available from the RCSB PDB. Users can access the features by topic (such as "Health and Disease" or "Biotechnology and Nanotechnology") or an alphabetical index of categories.

MotM features are widely used by diverse audiences (Box 3). Examples of educational programs, projects, and resources developed based on or impacted by our efforts are described in the following sections.

### Box 3. Usage of the Molecule of the Month

Access and download statistics of individual monthly features over a period of time (e.g., approximately 18,000 unique visits for the feature on hemoglobin during the first nine months of 2014) document their popularity. Interestingly, MotM features are not only

accessed immediately upon publication, but continue to be used many years later. An on-line survey of PDB-101 users, conducted in 2014, revealed that 74% of the approximately 700 respondents used one or more MotM features, with 49% downloading images for their own use, 46% using the interactive JSmol viewer, 40% viewing related structures, and 33% using our suggestions for exploration of related topics, provided at the end of each feature. While this survey is not exhaustive, it provides self-reported measures of which feature components are being used. Complementary metrics available from Google Analytics (<http://www.google.com/analytics>) documented over 350,000 sessions that accessed MotM pages between August 1, 2014, and January 18, 2015. These sessions originated from various search engines, links from scientific databases worldwide, and resources such as Foldit (<http://fold.it/portal>). MotM content is also reproduced with formal written permission by textbook authors, editors, and journalists (25 requests were processed in 2014).

## Molecule of the Month In Student Research

Two projects initiated at the Center for BioMolecular Modeling at the Milwaukee School of Engineering (CBM MSOE) illustrate how student research projects incorporate the MotM. The Connecting Researchers, Educators and Students (CREST) program (<http://cbm.msoe.edu/stupro/crest>) pairs local university researchers and educators with undergraduate students to work together on a research topic. MotM features have been assigned as foundational reading material for several of the CREST projects and have been incorporated into their posters, videos, tutorials, and scientific articles for use in undergraduate education.

In another CBM program, teachers from high schools nationwide learn about biological molecules by visualizing protein structures using MotM features. The teachers then lead a team of students to work with a local scientist on a research topic in a program called Students Modeling a Research Topic (SMART) teams. The teams model biomolecular structures based on available literature under the scientist's guidance, often using MotM features for background research. Physical models created by these SMART teams provide useful "tools" for discussing the topic and designing new experiments [9,10]. The teams often present their work and models at local, regional, or national meetings organized by professional societies (e.g., ASBMB), giving students in these teams a taste of research experience.

## Informing and Challenging the Next Generation of Citizens and Scientists

The high school student protein modeling event in the Science Olympiad (<http://soinc.org>) [11], a large, nationwide scientific challenge, was originally developed by CBM MSOE and is now being operated jointly by RCSB PDB and CBM MSOE (Fig 3). To participate, students are required to read about a specific theme, build 3-D molecular models of proteins, and answer exam questions about the biology of the modeled molecular structures [12]. Links to specially prepared or extant MotM features provide the necessary background information for participants and serve as the source for many of the exam questions. Annually, 5,000–7,000 teams (with two to three students per team) participate throughout the US. Competitions are conducted at regional and state levels in late fall through early spring, leading up to the national-level competitions in May. Preparation for the competitions motivates students, teachers, coaches, and judges to read MotM features relevant to the competition.

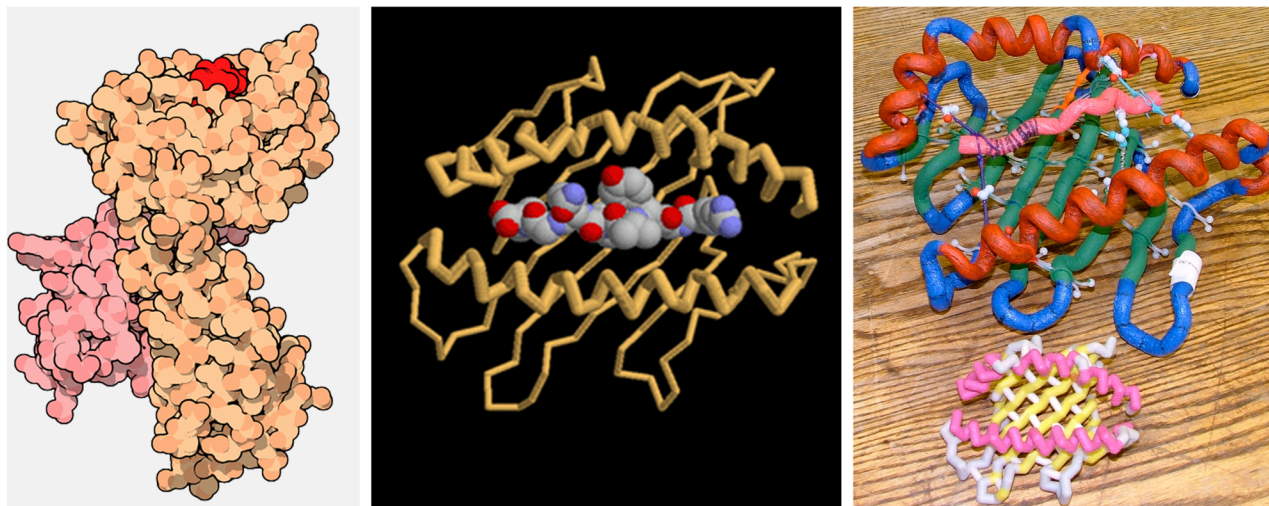

**Fig 3. Protein modeling at the Science Olympiad.** The Protein Modeling event uses MotM features to provide a scientific foundation. An example of how the models of the Major Histocompatibility Complex [27] are built in the competition is shown. Illustrations (left panel) and descriptions introduce the competition's topic and the section on Exploring the Structure (central panel) and JSmol interactive views show details of the functionally important regions of the protein model. Students visualize the assigned molecules in the CBM MSOE environment to guide their model building. An example of student-built toober model is shown (top model in the right panel) along with a 3-D printed model of the same protein (lower model in the right panel, lacking the bound peptide) that event officials use for judging the model. Images in the right panel were kindly provided by Tim Herman, with permission.

doi:10.1371/journal.pbio.1002140.g003

Other competitions and extracurricular scientific events use MotM features as foundational materials, as well. For example, the RCSB PDB video challenge for high school students, started in 2014, challenged students to create two-minute videos highlighting aspects of the structural biology of HIV [13]. Challenge contributors with diverse interests cited the MotM features as resources used for creating their videos. Another example is noted in RCSB PDB's "Education Corner" newsletter: the Protein Modeling Challenge at Stony Brook University, which pointed students to MotM features for background research on Ras proteins as molecular switches [14].

## Molecule of the Month In the Classroom

We have received many anecdotal reports from educators using MotM features in manifold and creative ways. Some have assigned different topics to each student for presentation in their classrooms, using relevant MotM features as starting points for further study. One educator combined art with science, creating original paintings of molecules using proteins highlighted in MotM features as sources of inspiration (Fig 4). This project is particularly exciting, as the students are drawing directly from primary scientific data. Professional curriculum developers include links to MotM features (see, for instance, [15] and <http://www.hhmi.org/biointeractive/how-do-fibers-form>). As part of its outreach and educational mission, the RCSB PDB has developed short lesson plans on topics, such as double helical DNA, green fluorescent protein, and the HIV capsid, in which relevant MotM features are combined with hands-on activities (Fig 5). In addition to engaging students, these lesson plans are used to train teachers at local and national workshops. Scientists at all levels (undergraduate, graduate, postdoctoral, and faculty) also use these lesson plans and materials in specialist courses, such as in the Applied Bioinformatics Course at Peking University (since 2000) and the annual Interdisciplinary Quantitative Biology Boot Camp at Rutgers University (since 2014).

Our recent survey of PDB-101 users documented that, today, a majority of our users come from colleges, universities, and research institutes. Only 8% of respondents identified



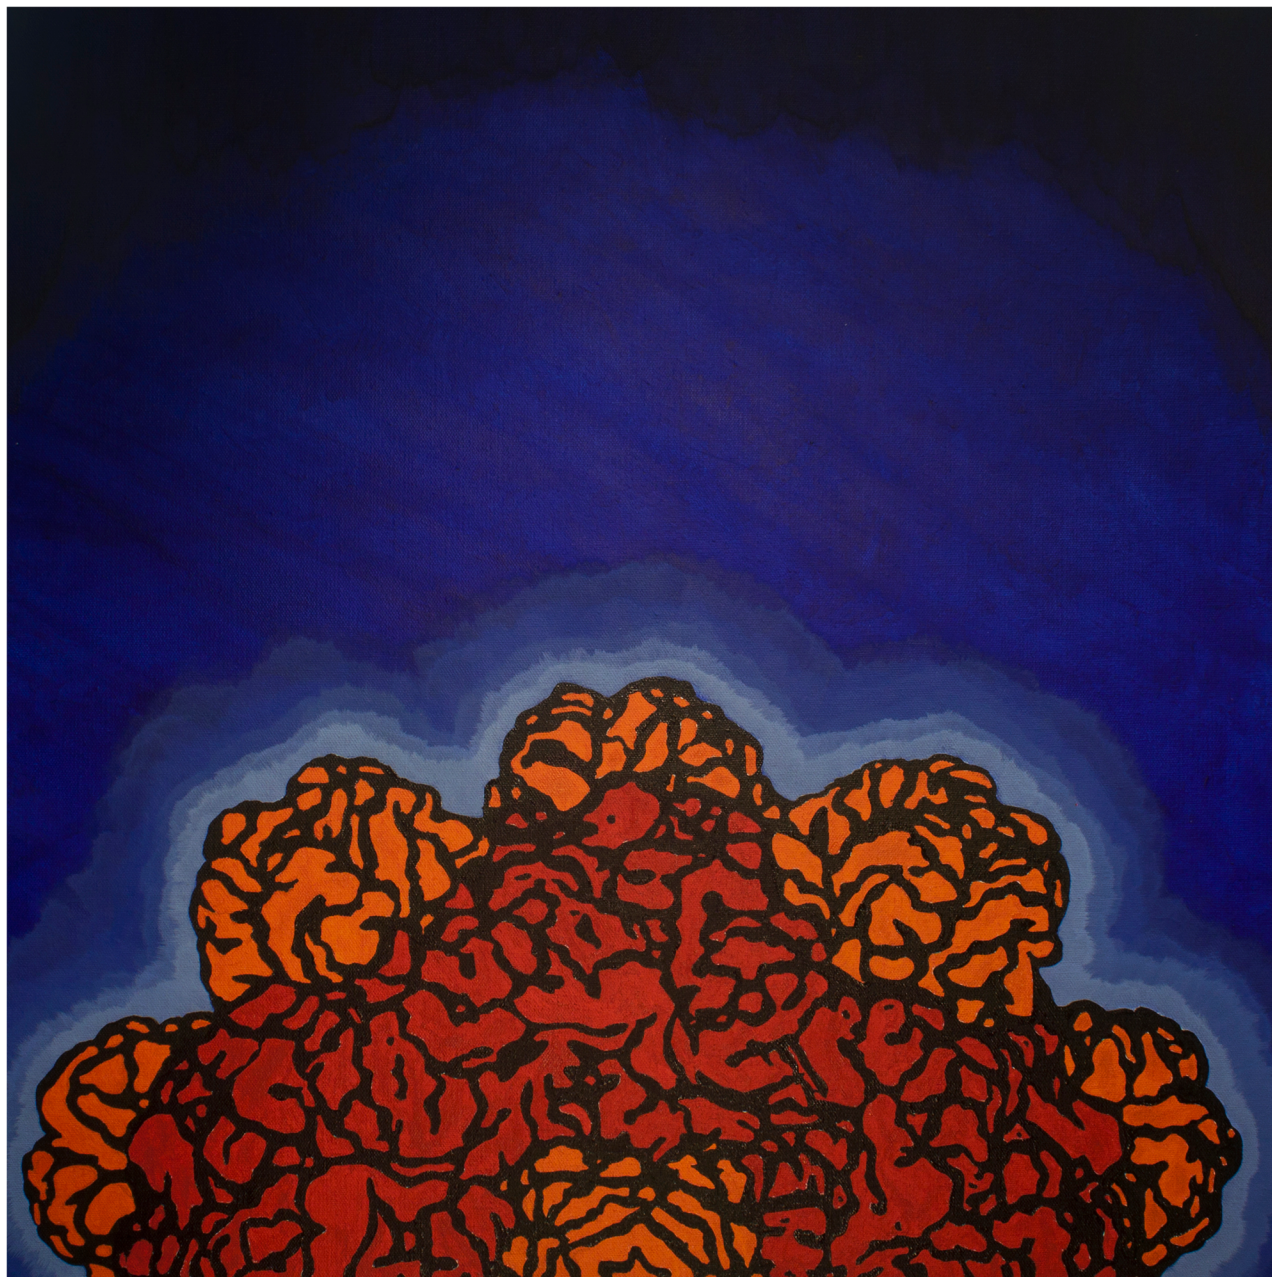

**Fig 4. Molecular machines at High Tech High.** Parag Chowdhury and his students at High Tech High in North County San Diego, California, combined art and science to explore molecular machines. Using the RCSB PDB MotM features as starting points, they created original paintings of biomolecules and wrote one-page descriptions of the role played by each biomolecule in the cell. They then combined all of this creative work into a book, *Molecular Machines: How Are We Assembled?*, currently available through the on-demand publisher Blurb. The painting of a bacterial virus or bacteriophage [28], shown above, was used on the cover of the book, and was kindly provided by Parag Chowdhury with permission.

doi:10.1371/journal.pbio.1002140.g004

themselves as being from K–12 institutions. We have, therefore, taken concerted steps to strengthen our outreach, with particular focus on high school science educators and students. We plan to augment K–12 usage by introducing focused curricula, teacher training, and competitions such as the video challenge. In 2014, RCSB PDB coordinated development of HIV/AIDS curricula for general biology and AP biology students, in collaboration with scientists,

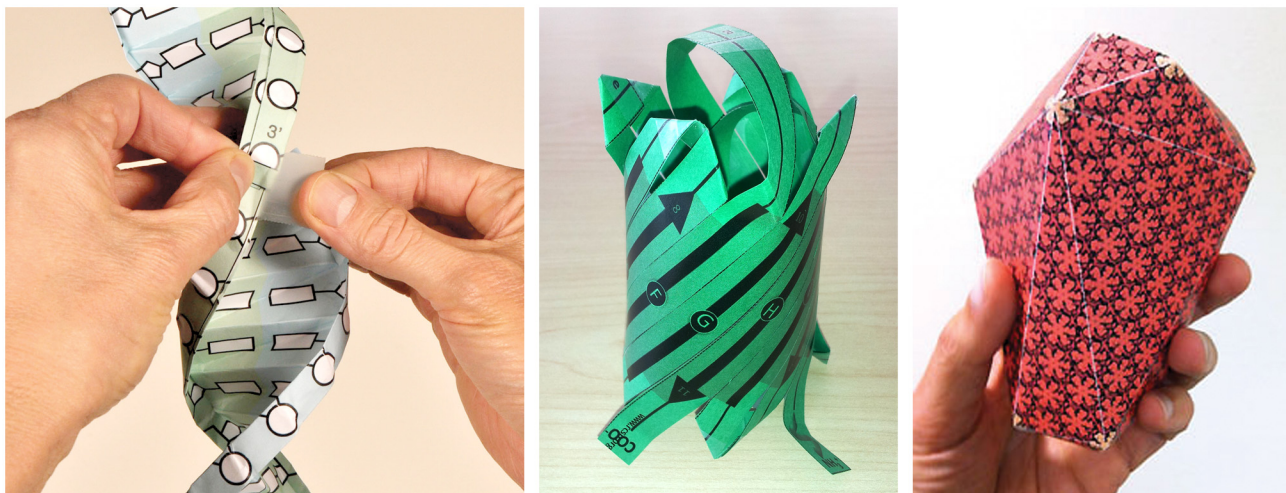

**Fig 5. Molecular origami.** Templates for paper models of selected MotM-featuring structures present the opportunity to make low cost and easily accessible physical models. Integrating these models with the MotM features provides new perspectives on these molecules. Examples of a few paper models include: DNA double helix (left panel), green fluorescent protein (center panel) [29], and HIV capsid (right panel) [30]. These and other paper models and associated MotM features are available for download from [http://www.pdb.org/pdb/101/static101.do?p=education\\_discussion/educational\\_resources/index.html](http://www.pdb.org/pdb/101/static101.do?p=education_discussion/educational_resources/index.html).

doi:10.1371/journal.pbio.1002140.g005

curriculum design experts, educators, clinicians, and local high school teachers. These curricula use authentic (primary scientific) data, conform to current science teaching standards, and include hands-on teaching materials, individual and group activities, and suggestions for student assessment and curriculum evaluation. Initial activities in the curricula explain the structure and function of biological molecules playing key roles in human immunity. A separate module focuses on the targeted nature of HIV infection affecting helper T-cells and both current and emerging strategies for treating HIV infection (Fig 6). Version 1.0 of the general biology and AP biology curricula are available from PDB-101 at <http://education.rcsb.org/curriculum>.

## Future Plans

Since 2013, RCSB PDB educational and outreach efforts have been integrating basic science and medicine by focusing on an important public health-related topic. Our current focus is on HIV/AIDS. We use customized educational materials that showcase various HIV proteins from the PDB archive and explain at the molecular level in atomic detail how the US Food and Drug Administration (FDA)-approved combination anti-retroviral therapy (cART) regimens target selected HIV proteins. Relevant MotM features are presented using multiple modalities, including a video challenge and newly developed hands-on educational materials. Beginning in 2016, we will focus on type 2 diabetes mellitus. Going beyond the MotM feature on insulin, new educational material will be developed on the insulin receptor, insulin signaling, glucagon and its receptor, glycated hemoglobin A1c, and the mechanisms of action of glucose-lowering drugs approved by the US FDA.

Historically, some of the topics discussed in the MotM features have been selected in response to community requests. Features on catalase and carbonic anhydrase, commonly used in high school and college laboratory exercises, were both developed following educator suggestions, and are currently the third and fourth most frequently used features. Most recently,



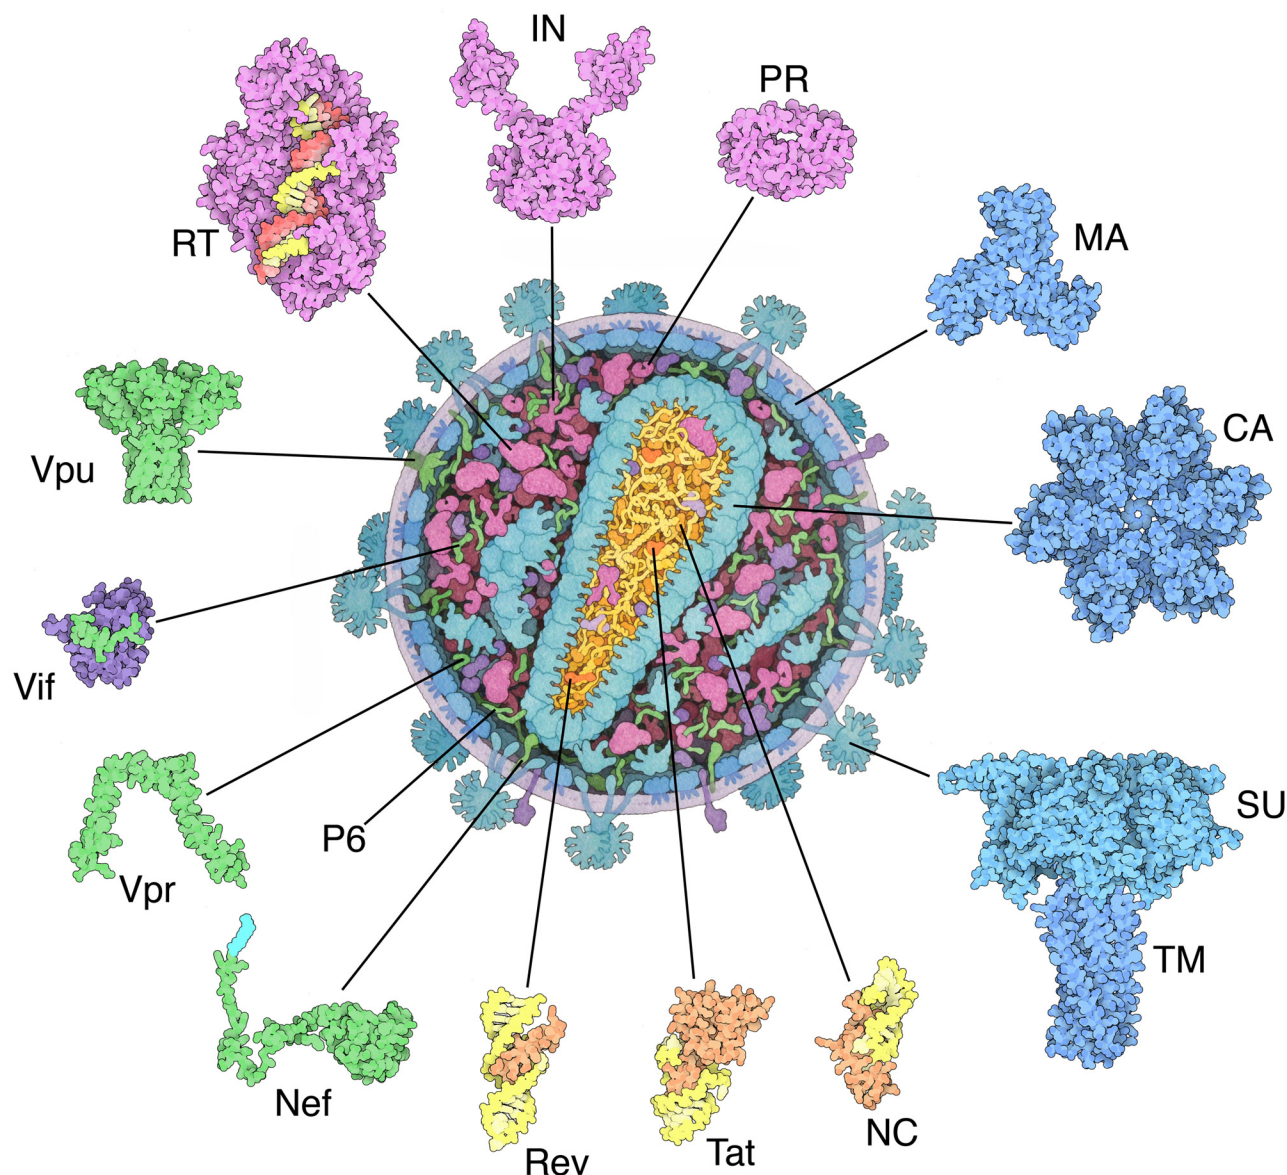

**Fig 6. HIV/AIDS curriculum.** Selected MotM features and educational materials developed at the RCSB PDB, such as this image of the anatomy of HIV and the proteins encoded by the HIV genome, are combined with other public resources in a curriculum that explores immunity and our defenses against HIV. The modular curriculum includes three main components: (i) review of the structure and function of biological molecules; (ii) introduction to the human immune system; and (iii) module on HIV/AIDS biology, treatments, and global impact. Two versions of the curricula are available for use in general biology and AP biology classrooms together with suggestions for assessing student learning. In addition to curricular material, pre- and post-tests are included. The curricula conform to current science teaching standards and core curricula and are available at <http://education.rcsb.org/curriculum>.

doi:10.1371/journal.pbio.1002140.g006

MotM features have been inspired by current events, such as the Ebola crisis in west Africa, which inspired us to produce a video on the molecular anatomy of the virus (<http://www.youtube.com/watch?v=9SptF9bCyd0>). The RCSB PDB welcomes requests and suggestions for new MotM features. Our overall goal in all these efforts is to bring a molecular structural view of biology and medicine to a large and diverse community.

## Acknowledgments

We thank our users and our current and past website developers, particularly Boki Beran, Chunxiao Bi, Wolfgang Bluhm, Cole Christie, Andreas Prlić, Greg Quinn, Alex Ramos, Peter Rose, and Jesse Woo, for their support in organizing and presenting this project.

## References

1. Barber NC, Stark LA. Engaging with molecular form to understand function. *CBE Life Sci Educ* 2014; 13: 21–24. doi: [10.1187/cbe.13-12-0247](https://doi.org/10.1187/cbe.13-12-0247) PMID: [24591499](https://pubmed.ncbi.nlm.nih.gov/24591499/)
2. Berman HM, Westbrook J, Feng Z, Gilliland G, Bhat TN, Weissig H, et al. The Protein Data Bank. *Nucleic Acids Res* 2000; 28: 235–242. PMID: [10592235](https://pubmed.ncbi.nlm.nih.gov/10592235/)
3. Martz E. Protein Explorer: easy yet powerful macromolecular visualization. *Trends Biochem Sci* 2002; 27: 107–109. PMID: [11852249](https://pubmed.ncbi.nlm.nih.gov/11852249/)
4. Velankar S, Alhroub Y, Best C, Caboche S, Conroy MJ, Dana JM, et al. PDBe: Protein Data Bank in Europe. *Nucleic Acids Res* 2012; 40: D445–452. doi: [10.1093/nar/gkr998](https://doi.org/10.1093/nar/gkr998) PMID: [22110033](https://pubmed.ncbi.nlm.nih.gov/22110033/)
5. Hodis E, Prilusky J, Martz E, Silman I, Moulton J, Sussman JL. Proteopedia—a scientific 'wiki' bridging the rift between three-dimensional structure and function of biomacromolecules. *Genome Biol* 2008; 9: R121. doi: [10.1186/gb-2008-9-8-r121](https://doi.org/10.1186/gb-2008-9-8-r121) PMID: [18673581](https://pubmed.ncbi.nlm.nih.gov/18673581/)
6. Berman H, Henrick K, Nakamura H. Announcing the worldwide Protein Data Bank. *Nature structural biology* 2003; 10: 980. PMID: [14634627](https://pubmed.ncbi.nlm.nih.gov/14634627/)
7. Rose PW, Prlic A, Bi C, Bluhm WF, Christie CH, Dutta S, et al. The RCSB Protein Data Bank: views of structural biology for basic and applied research and education. *Nucleic Acids Res* 2015; 43: D345–356. doi: [10.1093/nar/gku1214](https://doi.org/10.1093/nar/gku1214) PMID: [25428375](https://pubmed.ncbi.nlm.nih.gov/25428375/)
8. Rose PW, Bi C, Bluhm WF, Christie CH, Dimitropoulos D, Dutta S, et al. The RCSB Protein Data Bank: new resources for research and education. *Nucleic Acids Res* 2013; 41: D475–482. doi: [10.1093/nar/gks1200](https://doi.org/10.1093/nar/gks1200) PMID: [23193259](https://pubmed.ncbi.nlm.nih.gov/23193259/)
9. Herman T. Teaching Science Through Protein Modeling. *ASBMB Today*. September 2010. [http://www.asbmb.org/asbmbtoday/asbmbtoday\\_article.aspx?id=9158](http://www.asbmb.org/asbmbtoday/asbmbtoday_article.aspx?id=9158)
10. Hata TS. PDB Education Corner. *RCSB PDB Newsletter* 2004; 21. [http://www.pdb.org/pdb/static.do?p=general\\_information/news\\_publications/newsletters/2004q1/hata.html](http://www.pdb.org/pdb/static.do?p=general_information/news_publications/newsletters/2004q1/hata.html)
11. Putz G. J. K, J. Science Olympiad and the ASBMB: Inspiring the next generation of scientists. *ASBMB Today*. February 2013. [http://www.asbmb.org/asbmbtoday/asbmbtoday\\_article.aspx?id=32460](http://www.asbmb.org/asbmbtoday/asbmbtoday_article.aspx?id=32460)
12. Dutta S, Zardecki C, Goodsell DS, Berman HM. Promoting a structural view of biology for varied audiences: an overview of RCSB PDB resources and experiences. *J Appl Crystallogr* 2010; 43: 1224–1229. PMID: [20877496](https://pubmed.ncbi.nlm.nih.gov/20877496/)
13. Bhattacharya M, Jaworsky C, Lucci K. Education Corner: Mentoring High School Students for the RCSB PDB HIV Video Challenge. *RCSB PDB Newsletter* 2015; 64. [http://www.pdb.org/pdb/general\\_information/news\\_publications/newsletters/2015q1/corner.html](http://www.pdb.org/pdb/general_information/news_publications/newsletters/2015q1/corner.html)
14. Kiely J. Education Corner: Protein Challenge. *RCSB PDB Newsletter* 2010; 47. [http://www.pdb.org/pdb/general\\_information/news\\_publications/newsletters/2010q3/education\\_corner.html](http://www.pdb.org/pdb/general_information/news_publications/newsletters/2010q3/education_corner.html)
15. Chowning JT, Kovarik D., Griswold J. Modeling Protein Structure & Function: Pencil Transferase. *The American Biology Teacher* 2012; 74: 581–582.
16. Beese LS, Derbyshire V, Steitz TA. Structure of DNA polymerase I klenow fragment bound to duplex DNA. *Science* 1993; 260: 352–355. PMID: [8469987](https://pubmed.ncbi.nlm.nih.gov/8469987/)
17. Klein DJ, Schmeing TM, Moore PB, Steitz TA. The kink-turn: a new RNA secondary structure motif. *The EMBO journal* 2001; 20: 4214–4221. PMID: [11483524](https://pubmed.ncbi.nlm.nih.gov/11483524/)
18. Wimberly BT, Brodersen DE, Clemons WM Jr., Morgan-Warren R, Carter AP, Vonnrhein C, et al. Structure of the 30S ribosomal subunit. *Nature* 2000; 407: 327–339. PMID: [11014182](https://pubmed.ncbi.nlm.nih.gov/11014182/)
19. Fermi G, Perutz MF, Shaanan B, Fourme R. The crystal structure of human deoxyhaemoglobin at 1.74 Å resolution. *J Mol Biol* 1984; 175: 159–174. PMID: [6726807](https://pubmed.ncbi.nlm.nih.gov/6726807/)
20. Rastogi VK, Girvin ME. Structural changes linked to proton translocation by subunit c of the ATP synthase. *Nature* 1999; 402: 263–268. PMID: [10580496](https://pubmed.ncbi.nlm.nih.gov/10580496/)
21. Gibbons C, Montgomery MG, Leslie AG, Walker JE. The structure of the central stalk in bovine F(1)-ATPase at 2.4 Å resolution. *Nat Struct Biol* 2000; 7: 1055–1061. PMID: [11062563](https://pubmed.ncbi.nlm.nih.gov/11062563/)
22. Rasmussen SG, DeVree BT, Zou Y, Kruse AC, Chung KY, Kobilka TS, et al. Crystal structure of the beta2 adrenergic receptor-Gs protein complex. *Nature* 2011; 477: 549–555. doi: [10.1038/nature10361](https://doi.org/10.1038/nature10361) PMID: [21772288](https://pubmed.ncbi.nlm.nih.gov/21772288/)

23. Kramer R, Bella J, Mayville P, Brodsky B, Berman HM. Sequence dependent conformational variations of collagen triple-helical structure. *Nat Struct Biol* 1999; 6: 454–457. PMID: [10331873](#)
24. Schmeing TM, Voorhees RM, Kelley AC, Gao YG, Murphy FVt, Weir JR, et al. The crystal structure of the ribosome bound to EF-Tu and aminoacyl-tRNA. *Science* 2009; 326: 688–694. doi: [10.1126/science.1179700](#) PMID: [19833920](#)
25. Voorhees RM, Weixlbaumer A, Loakes D, Kelley AC, Ramakrishnan V. Insights into substrate stabilization from snapshots of the peptidyl transferase center of the intact 70S ribosome. *Nat Struct Mol Biol* 2009; 16: 528–533. doi: [10.1038/nsmb.1577](#) PMID: [19363482](#)
26. Gao YG, Selmer M, Dunham CM, Weixlbaumer A, Kelley AC, Ramakrishnan V. The structure of the ribosome with elongation factor G trapped in the posttranslocational state. *Science* 2009; 326: 694–699. doi: [10.1126/science.1179709](#) PMID: [19833919](#)
27. Fremont DH, Matsumura M, Stura EA, Peterson PA, Wilson IA. Crystal structures of two viral peptides in complex with murine MHC class I H-2Kb. *Science* 1992; 257: 919–927. PMID: [1323877](#)
28. Dokland T, Bernal RA, Burch A, Pletnev S, Fane BA, Rossmann MG. The role of scaffolding proteins in the assembly of the small, single-stranded DNA virus phiX174. *J Mol Biol* 1999; 288: 595–608. PMID: [10329166](#)
29. Yang F, Moss LG, Phillips GN Jr. The molecular structure of green fluorescent protein. *Nat Biotechnol* 1996; 14: 1246–1251. PMID: [9631087](#)
30. Zhao G, Perilla JR, Yufenyuy EL, Meng X, Chen B, Ning J, et al. Mature HIV-1 capsid structure by cryo-electron microscopy and all-atom molecular dynamics. *Nature* 2013; 497: 643–646. doi: [10.1038/nature12162](#) PMID: [23719463](#)
